# Supplementary material for: Structural Characterization, Cytotoxicity, and the Antifungal Mechanism of a Novel Peptide Extracted from Garlic (Allium sativa L.)
Source: MDPI journal article supplement (doi:10.3390/molecules28073098), 2023-03-30
Supplement: s1 [file s1]

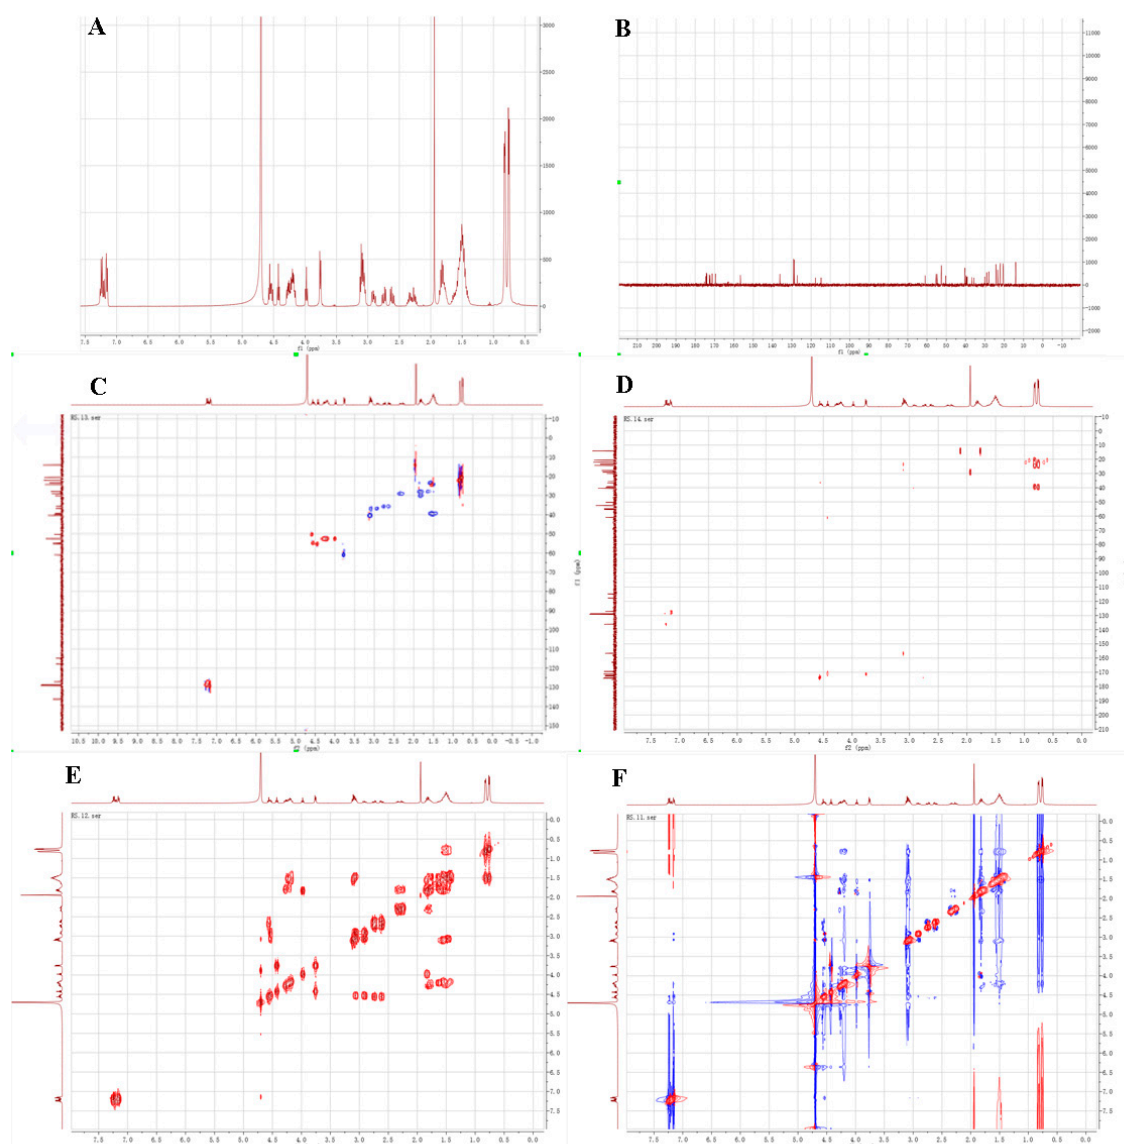

Figure S1 NMR spectra of RSLNLLMFR. A,  $^1\text{H}$  NMR spectrum. B,  $^{13}\text{C}$  NMR spectrum. C, HSQC NMR spectrum. D, HMBC NMR spectrum. E, COSY NMR spectrum. F, NOESY NMR spectrum
